# Supplementary material for: Determinants of Continued Breastfeeding at 12 and 24 Months: Results of an Australian Cohort Study
Source: MDPI journal article supplement (doi:10.3390/ijerph16203980), 2019-10-18
Supplement: s1 [file s1]

Table S1. Comparison of characteristics of participants and non-participants and South Australian (SA) pregnancy outcome data for 2013.

|                                          | Participant<br>(n = 1450) |        |      | Non-Participants<br>(n = 662) |        |      | SA Pregnancy Outcome 2013<br>(n = 19,925) |        |      |
|------------------------------------------|---------------------------|--------|------|-------------------------------|--------|------|-------------------------------------------|--------|------|
|                                          | %                         | 95% CI |      | %                             | 95% CI |      | %                                         | 95% CI |      |
| <i>Maternal age (yrs)</i>                |                           |        |      |                               |        |      |                                           |        |      |
| <25                                      | 13.1                      | 11.4   | 14.8 | 22.1                          | 18.9   | 25.3 | 17.8                                      | 17.2   | 18.4 |
| 25–29                                    | 32.6                      | 30.2   | 35.0 | 29.2                          | 25.7   | 32.7 | 29.4                                      | 28.7   | 30.1 |
| 30+                                      | 54.1                      | 51.5   | 56.7 | 47.7                          | 43.9   | 51.5 | 52.7                                      | 51.7   | 53.7 |
| <i>Maternal education</i>                |                           |        |      |                               |        |      |                                           |        |      |
| High school/vocational                   | 48.8                      | 46.2   | 51.4 | 64.8                          | 61.2   | 68.4 | N/A                                       |        |      |
| Some <sup>a</sup> university or graduate | 50.8                      | 48.2   | 53.4 | 34.9                          | 31.3   | 38.5 |                                           |        |      |
| <i>IRSAD<sup>b</sup> deciles</i>         |                           |        |      |                               |        |      |                                           |        |      |
| IRSAD deciles 1–2                        | 19.1                      | 17.1   | 21.1 | 27.9                          | 24.5   | 31.3 | N/A                                       |        |      |
| IRSAD deciles 3–4                        | 20.8                      | 18.7   | 22.9 | 21.9                          | 18.7   | 25.1 |                                           |        |      |
| IRSAD deciles 5–6                        | 19.7                      | 17.7   | 21.7 | 15.9                          | 13.1   | 18.7 |                                           |        |      |
| IRSAD deciles 7–8                        | 18.7                      | 16.7   | 20.7 | 17.5                          | 14.6   | 20.4 |                                           |        |      |
| IRSAD deciles 9–10                       | 21.3                      | 19.2   | 23.4 | 13.7                          | 11.1   | 16.2 |                                           |        |      |
| <i>Mother's country of birth</i>         |                           |        |      |                               |        |      |                                           |        |      |
| Australia/New Zealand                    | 71.4                      | 69.1   | 73.7 | 63.1                          | 59.4   | 66.8 | 76.5                                      | 75.4   | 77.6 |
| UK                                       | 3.6                       | 2.6    | 4.6  | 3.8                           | 2.3    | 5.3  | 2.5                                       | 2.3    | 2.7  |
| China                                    | 7.6                       | 6.2    | 9.0  | 2.3                           | 1.2    | 3.4  | 2.2                                       | 2.0    | 2.4  |
| India                                    | 3.4                       | 2.5    | 4.3  | 11.5                          | 9.1    | 13.9 | 4.0                                       | 3.7    | 4.3  |
| Rest of Asia                             | 7.2                       | 5.9    | 7.3  | 10.7                          | 8.3    | 13.1 | 6.4                                       | 6.1    | 6.7  |
| Other                                    | 6.1                       | 4.9    | 7.3  | 7.9                           | 5.8    | 10.0 | 5.8                                       | 5.5    | 6.1  |

<sup>a</sup> Commenced but did not complete University. <sup>b</sup> IRSAD: Index of Relative Socio-Economic Advantage and Disadvantage with decile 1 = most disadvantaged and 10 = most advantaged BF.

Table S2 Sensitivity analysis: Factors independently associated with breastfeeding at 12 months and 24 months postpartum with age of return to work removed

| Characteristics                          | BF at 12 months <sup>a</sup><br>(n = 1141) |           | BF at 24months <sup>a</sup><br>(n = 1281) |           |
|------------------------------------------|--------------------------------------------|-----------|-------------------------------------------|-----------|
|                                          | AOR                                        | 95%CI     | AOR                                       | 95%CI     |
| <i>Maternal characteristics</i>          |                                            |           |                                           |           |
| Age (years)                              |                                            |           |                                           |           |
| <25                                      | 0.49                                       | 0.24–0.99 | 0.50                                      | 0.15–1.60 |
| 25–34                                    | 0.84                                       | 0.57–1.24 | 0.64                                      | 0.37–1.13 |
| ≥35                                      | 1.00                                       |           | 1.00                                      |           |
| Highest level of education               |                                            |           |                                           |           |
| High school/vocational                   | 1.00                                       |           | 1.00                                      |           |
| Some <sup>a</sup> university or graduate | 2.23                                       | 1.57–3.16 | 1.17                                      | 0.66–2.08 |
| Country of birth                         |                                            |           |                                           |           |
| Australian & New Zealand                 | 1.00                                       |           | 1.00                                      |           |
| UK/Ireland                               | 0.53                                       | 0.21–1.32 | 1.78                                      | 0.61–5.20 |
| India                                    | 0.84                                       | 0.49–1.46 | 1.96                                      | 0.88–4.36 |
| China                                    | 1.55                                       | 0.75–3.21 | 1.57                                      | 0.43–5.75 |
| Other Asia                               | 1.06                                       | 0.59–1.89 | 3.31                                      | 1.58–6.93 |
| Other                                    | 1.46                                       | 0.77–2.75 | 1.79                                      | 0.78–4.13 |
| Pre-pregnancy BMI (kg/m <sup>2</sup> )   |                                            |           |                                           |           |
| <25                                      | 1.00                                       |           | 1.00                                      |           |
| ≥25                                      | 0.57                                       | 0.41–0.79 | 0.66                                      | 0.38–1.15 |
| Parity                                   |                                            |           |                                           |           |
| Primiparous                              | 1.00                                       |           | 1.00                                      |           |
| Multiparous                              | 1.43                                       | 1.03–1.99 | 1.01                                      | 0.61–1.68 |
| Partner's feeding preference             |                                            |           |                                           |           |
| Prefers breastfeeding                    | 1.78                                       | 1.25–2.52 | 1.57                                      | 0.86–2.87 |
| Prefers formula feeding or ambivalent    | 1.00                                       |           | 1.00                                      |           |
| <i>Child characteristics</i>             |                                            |           |                                           |           |
| Age received complementary foods         |                                            |           |                                           |           |
| Before 17 weeks                          | 0.44                                       | 0.24–0.79 | 0.62                                      | 0.25–1.54 |
| Between 17 and 25 weeks                  | 0.65                                       | 0.39–1.08 | 0.77                                      | 0.39–1.55 |
| At 26 weeks or later                     | 1.00                                       |           | 1.00                                      |           |
| Age received formula                     |                                            |           |                                           |           |
| Before 4 weeks                           | 0.04                                       | 0.03–0.07 | 0.21                                      | 0.12–0.39 |
| Between 4 and 7 weeks                    | 0.03                                       | 0.01–0.05 | 0.08                                      | 0.02–0.35 |
| Between 8 and 15 weeks                   | 0.05                                       | 0.02–0.09 | 0.14                                      | 0.05–0.42 |
| Between 16 and 25 weeks                  | 0.05                                       | 0.03–0.10 | 0.38                                      | 0.17–0.85 |
| At 26 weeks or later                     | 0.15                                       | 0.08–0.28 | 0.20                                      | 0.07–0.53 |
| Never received formula                   | 1.00                                       |           | 1.00                                      |           |

<sup>a</sup> Commenced but did not complete University. AOR adjusted odds ratio, BMI= Body Mass Index.

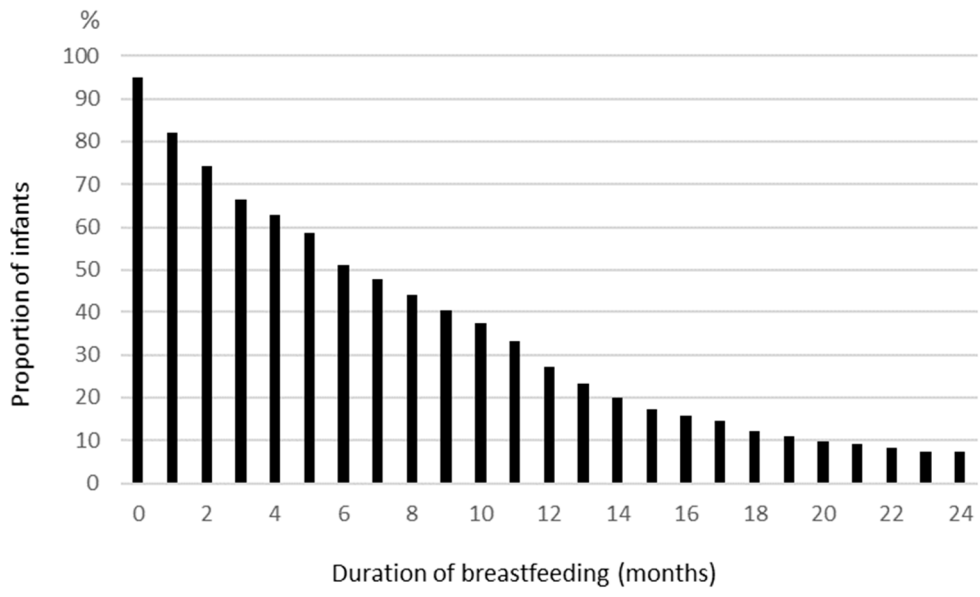

Figure S1. Proportion of children breastfed to each month of age.
